# Supplementary material for: Sub-second photonic processing of solution-deposited single layer and heterojunction metal oxide thin-film transistors using a high-power xenon flash lamp
Source: Royal Society of Chemistry journal article supplement (doi:10.1039/c7tc03721j), 2017-01-01
Supplement: c7tc03721j1.pdf [file c7tc03721j1.pdf]

## Supplementary Information

### Sub-second photonic processing of solution-deposited single layer and heterojunction metal oxide thin-film transistors using a high-power xenon flash lamp

Kornelius Tetzner,<sup>\*a</sup> Yen-Hung Lin,<sup>a</sup> Anna Regoutz,<sup>b</sup> Akmaral Seitkhan,<sup>c</sup> David J. Payne<sup>b</sup> and Thomas D. Anthopoulos<sup>\*a,c</sup>

<sup>a</sup>Department of Physics and Centre for Plastic Electronics, Blackett Laboratory, Imperial College London, London SW7 2BW, United Kingdom, \*E-Mail: k.tetzner@imperial.ac.uk

<sup>b</sup>Department of Materials, London Royal School of Mines, Imperial College London, London SW7 2AZ, United Kingdom

<sup>c</sup>Division of Physical Sciences and Engineering, King Abdullah University of Science and Technology, Thuwal 23955-6900, Saudi Arabia, \*E-Mail: thomas.anthopoulos@kaust.edu.sa

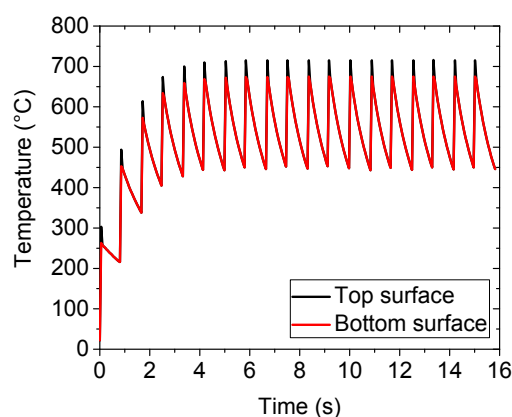

**Figure S1.** Simulations of the temperature profile on top and on the bottom of the  $\text{In}_2\text{O}_3$ -coated  $\text{Si}/\text{SiO}_2$  substrates after exposure to 20 xenon light pulses using energy densities of  $5 \text{ J}/\text{cm}^2$  and pulse lengths of  $500 \mu\text{s}$  at a fire rate of  $1.2 \text{ Hz}$  using the SimPulse software tool.

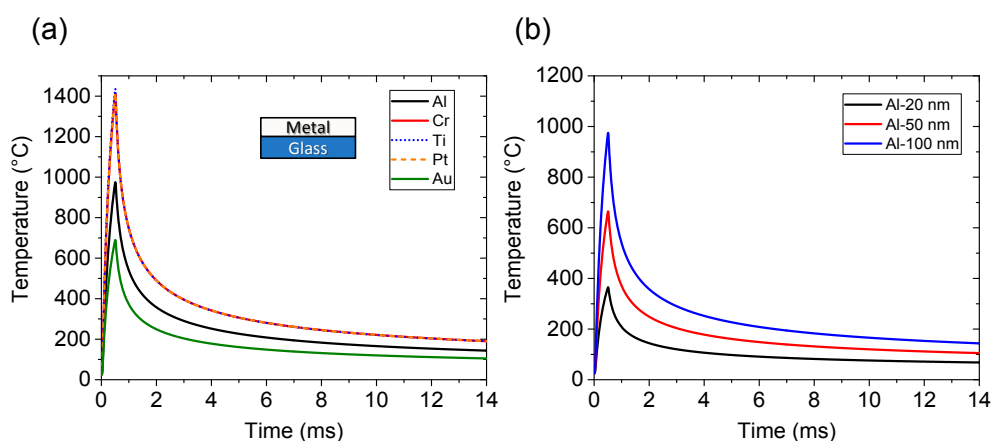

**Figure S2.** Comparison of the thermal response of; (a) different metals with fixed thicknesses of  $100 \text{ nm}$ , and (b) an Al layer with varying thicknesses, both on borosilicate glass substrates (thickness of  $1.1 \text{ mm}$ ) as simulated using SimPulse. The graphs show the temperature on top of the metal surface after a single xenon light pulse with a radiant energy density of  $5 \text{ J}/\text{cm}^2$  and a pulse length of  $500 \mu\text{s}$ .

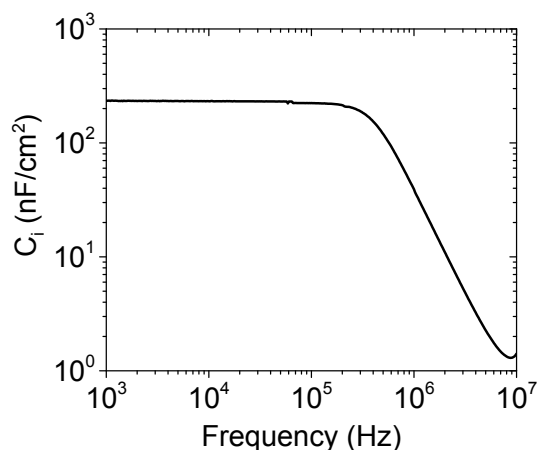

**Figure S3.** Geometric capacitance measured for the bilayer  $\text{AlO}_x/\text{ZrO}_x$  dielectric as a function of small alternating-current (AC) signal frequency. Characterisation was carried out using a metal-insulator-metal (Al/dielectric/Al) structure. A value of  $235 \text{ nF/cm}^2$  is calculated at a frequency of  $10^3 \text{ Hz}$ .

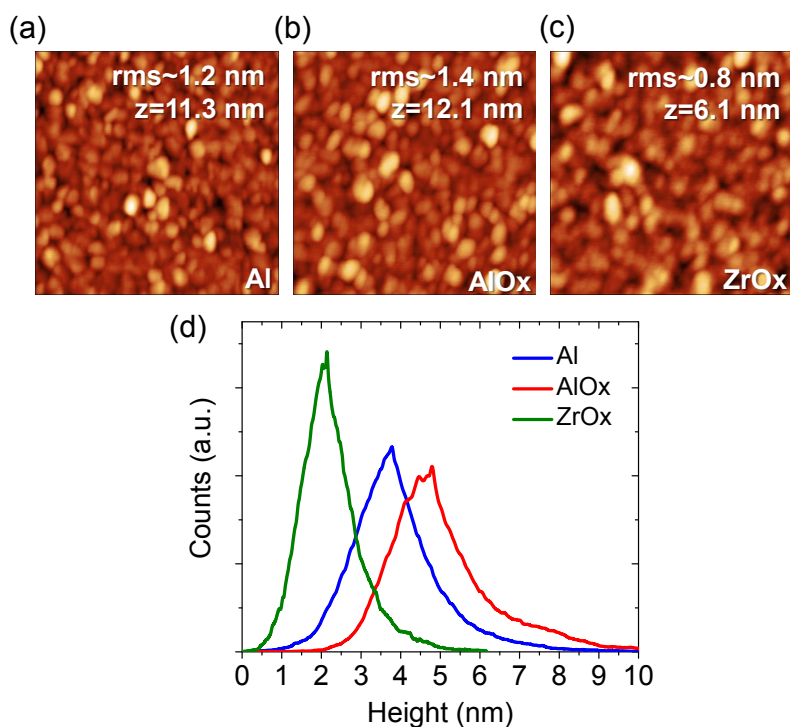

**Figure S4.** Atomic force microscopy (AFM) images of the surface topographies of: (a) a representative Al gate electrode, (b) Al/ $\text{AlO}_x$  formed via UV exposure, and (c) Al/ $\text{AlO}_x/\text{ZrO}_x$  grown by spin-coating the zirconia precursor solution onto the Al/ $\text{AlO}_x$  electrode followed by photochemical conversion. (d) Corresponding height distributions for the three samples. Broader height distribution indicates a rougher surface topography.

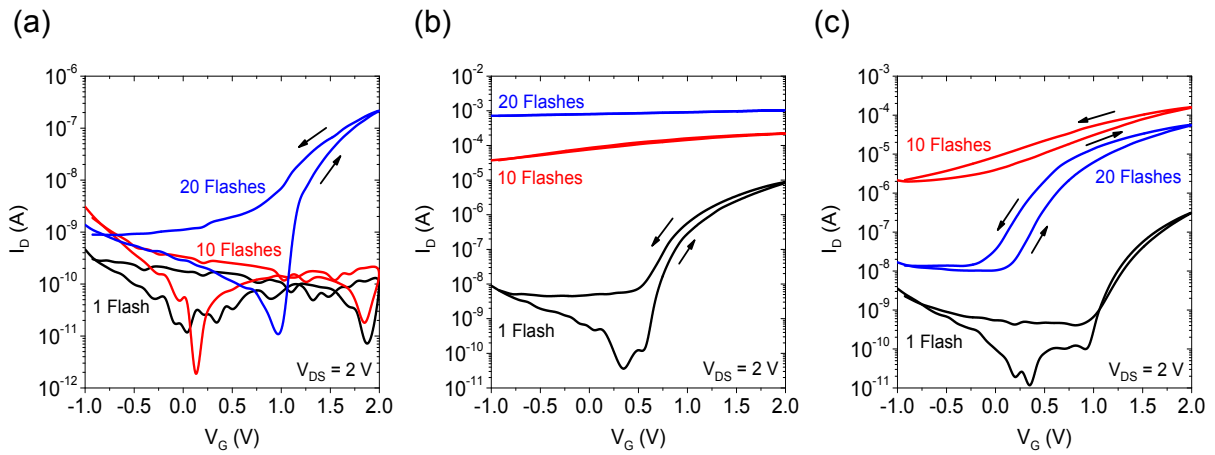

**Figure S5.** Evolution of the transfer curves for  $\text{In}_2\text{O}_3$  transistor devices photonicly cured using different flash parameters with pulse lengths and radiant energy densities of (a)  $500 \mu\text{s}$  at  $4 \text{ J/cm}^2$  (b)  $300 \mu\text{s}$  at  $5 \text{ J/cm}^2$  and (c)  $300 \mu\text{s}$  at  $4 \text{ J/cm}^2$  at a constant fire rate of  $1.2 \text{ Hz}$ .

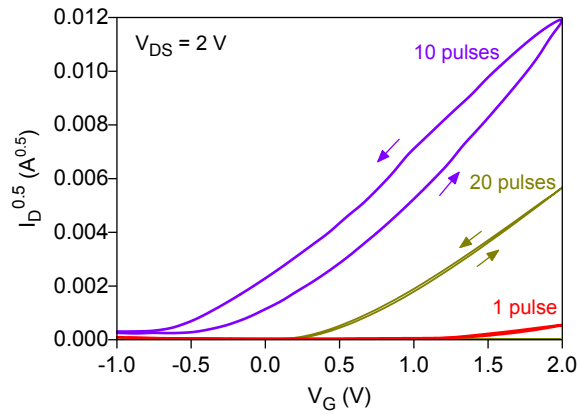

**Figure S6.**  $I_D^{0.5}$  vs.  $V_G$  plots measured for  $\text{In}_2\text{O}_3$  TFTs after soft-baking at  $130 \text{ }^\circ\text{C}$  and subsequently exposed to 1, 10 and 20 xenon light pulses with energy density per pulse and duration of  $5 \text{ J/cm}^2$  and  $500 \mu\text{s}$ , respectively. Multiple pulse exposure was performed at a fire rate of  $1.2 \text{ Hz}$ .

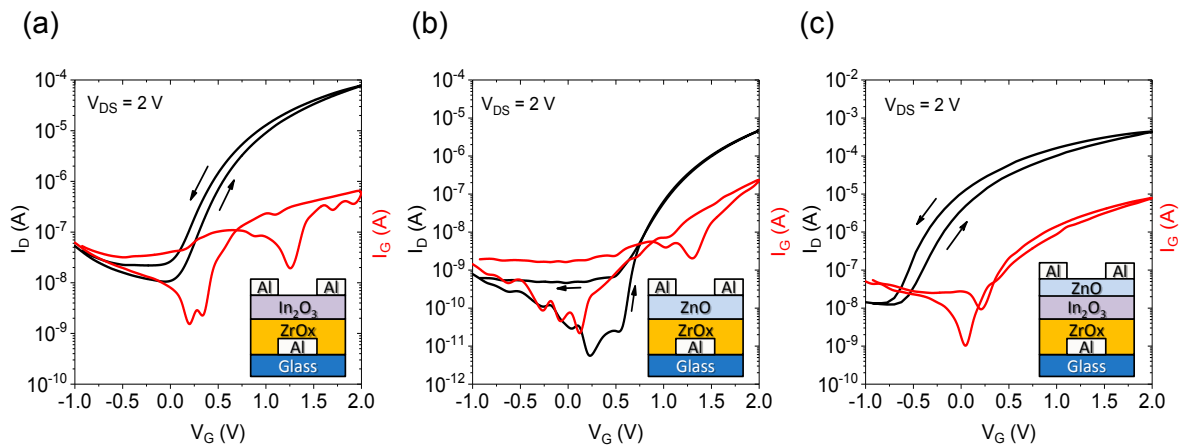

**Figure S7.** Transfer characteristics of (a)  $\text{In}_2\text{O}_3$ , (b)  $\text{ZnO}$  and (c)  $\text{In}_2\text{O}_3/\text{ZnO}$  transistors prepared via conventional thermal annealing at  $250 \text{ }^\circ\text{C}$  for  $1 \text{ h}$  in ambient air.

**Table S1.** Electrical parameters of solution-processed ZnO transistors fabricated using different post-deposition treatment conditions.

| Processing conditions                                    | $\mu_{\text{sat}}$<br>( $\text{cm}^2\text{V}^{-1}\text{s}^{-1}$ ) | $V_{\text{TH}}$<br>(V) | On/off<br>ratio |
|----------------------------------------------------------|-------------------------------------------------------------------|------------------------|-----------------|
| Baking at 110 °C for<br>1 hour                           | 0.3                                                               | 1.1                    | $5 \times 10^2$ |
| 1 Flash<br>(5 J/cm <sup>2</sup> , 500 $\mu\text{s}$ )    | 0.3                                                               | 0.4                    | $6 \times 10^3$ |
| 20 Flashes<br>(5 J/cm <sup>2</sup> , 500 $\mu\text{s}$ ) | 1.7                                                               | 0.6                    | $2 \times 10^4$ |
| Thermal annealing<br>at 250 °C for 1 hour                | 1.5                                                               | 1.1                    | $1 \times 10^4$ |

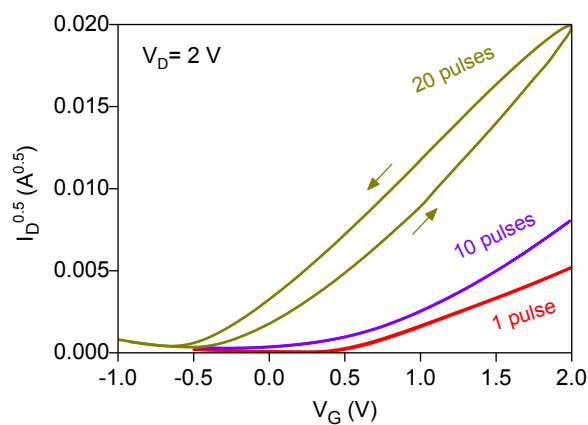

**Figure S8.**  $I_D^{0.5}$  vs.  $V_G$  plots of heterostructure thin-film transistors consisting of photonically cured  $\text{In}_2\text{O}_3$  films using 20 xenon pulses and single layer ZnO dried at 110 °C which were subsequently exposed to 1, 10 and 20 xenon flash pulses of energy densities of 5 J/cm<sup>2</sup> and pulse durations of 500  $\mu\text{s}$  at a fire rate of 1.2 Hz

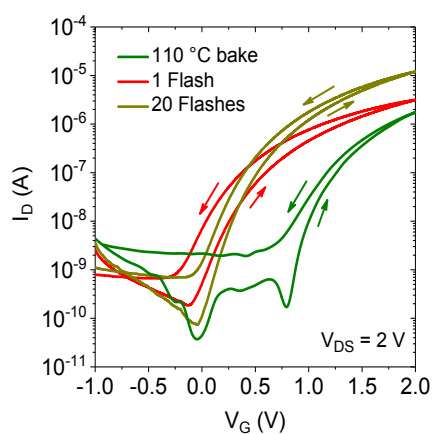

**Figure S9.** Evolution of the transfer curves for ZnO transistor devices photonically cured using flash parameters with pulse lengths and radiant energy densities of 500  $\mu\text{s}$  at 5 J/cm<sup>2</sup> at a constant fire rate of 1.2 Hz.

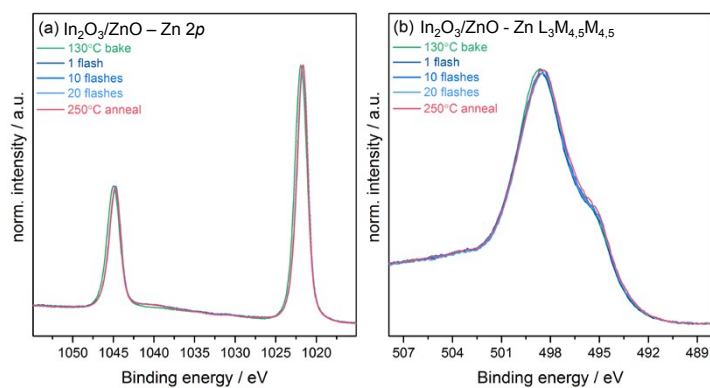

**Figure S10.** (a) Zn 2p core level and (b) Zn L3M4,5M4,5 Auger spectra for  $\text{In}_2\text{O}_3/\text{ZnO}$  heterostructure samples prepared using different methods including; soft-bake (130 °C bake), photonic conversion (1 to 20 flashes/pulses) as well as thermal annealing at 250 °C (anneal).

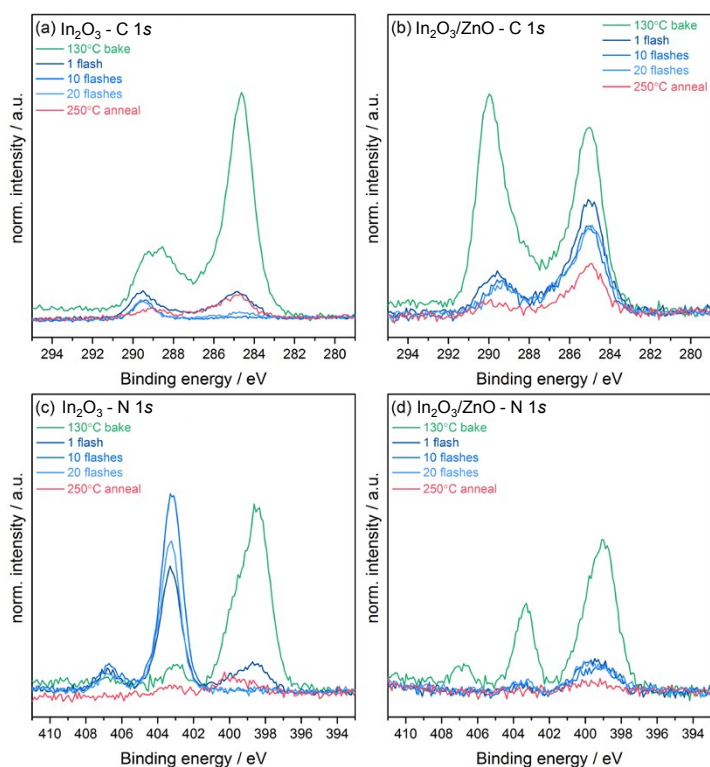

**Figure S11.** C and N 1s core level XPS spectra for (a) and (c)  $\text{In}_2\text{O}_3$  layer, and (b) and (d)  $\text{In}_2\text{O}_3/\text{ZnO}$  heterostructure samples prepared using different methods including; soft-bake (130 °C bake), photonic conversion (1 to 20 flashes/pulses) as well as thermal annealing at 250 °C (anneal).

**Table S2.** Relative atomic ratios from peak fit analysis of XPS core level spectra in  $\text{In}_2\text{O}_3$  and  $\text{In}_2\text{O}_3/\text{ZnO}$ .

| Sample       | In:N<br>( $\text{In}_2\text{O}_3$ ) | Zn:N<br>( $\text{In}_2\text{O}_3/\text{ZnO}$ ) |
|--------------|-------------------------------------|------------------------------------------------|
| 130°C bake   | 88:12                               | 94:6                                           |
| 1 Flash      | 92:8                                | 98:2                                           |
| 10 Flashes   | 91:9                                | 99:1                                           |
| 20 Flashes   | 92:8                                | 98:2                                           |
| 250°C anneal | 98:2                                | 99:1                                           |
